# Supplementary material for: Modulation of the surface properties of protein particles by a surfactant for stabilizing foams
Source: Royal Society of Chemistry journal article supplement (doi:10.1039/c6ra12569g), 2016-01-01

Fig. S1 Surface tension ( $\gamma$ ) as a function of time for air-water interface stabilized by (A) pure ZP/ZP-TA mixture, and (B) pure ZTP/ZTP-TA mixture.

Fig. S2 Images of foams taken immediately (a) and 5 min (a') after whipping of 15 mL of solution. Left to right: ZP, ZP-0.6 mM SDS, ZP-TA (TA, 2 mg/mL), ZTP, ZTP-TA (TA, 2 mg/mL). The protein concentration is 1%, w/v.

Fig. S1

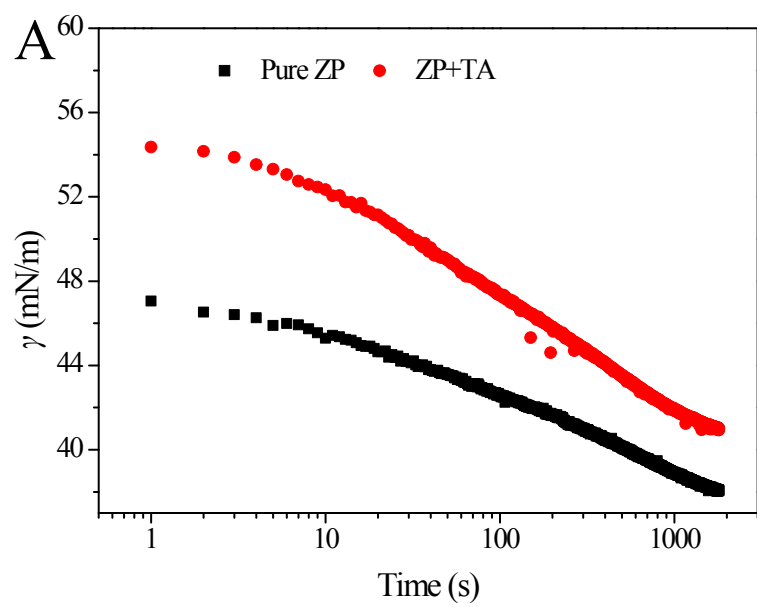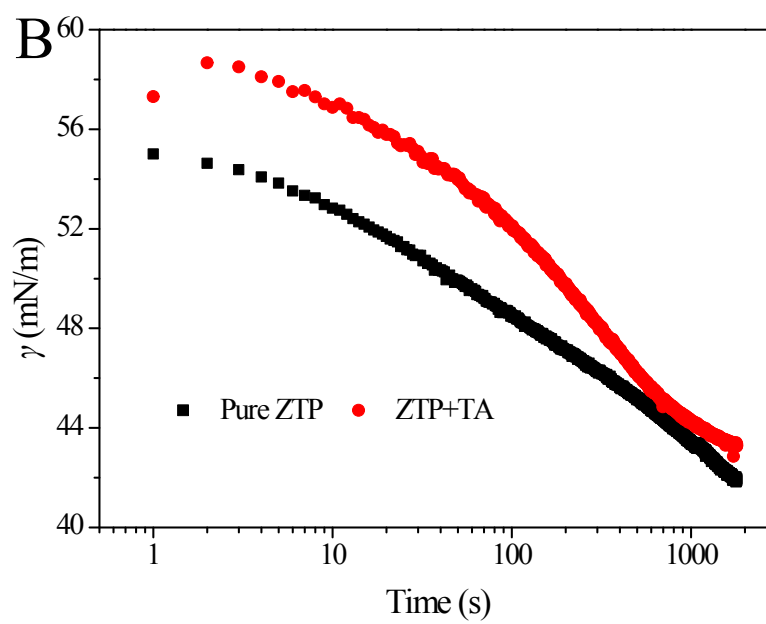

Fig. S2

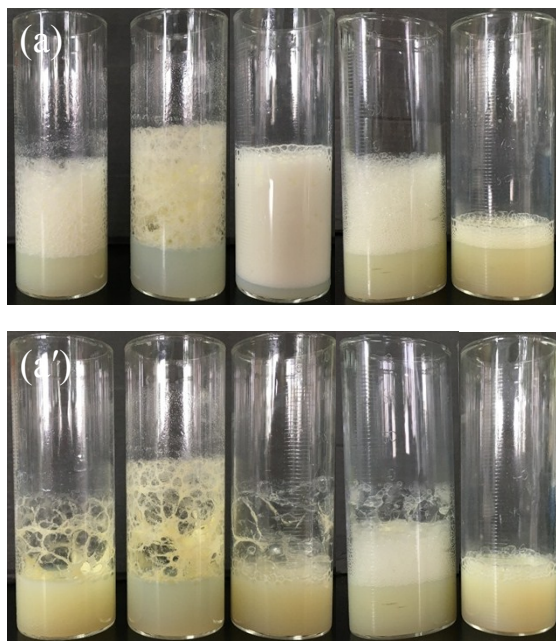

Supplement: c6ra12569g1.pdf [file c6ra12569g1.pdf]
